# Supplementary material for: Targeted NMDA receptor knockdown in recall‐activated neuronal ensembles impairs remote fear extinction
Source: Springer Nature journal article supplement (doi:10.1186/s13041-025-01203-z), 2025-04-05

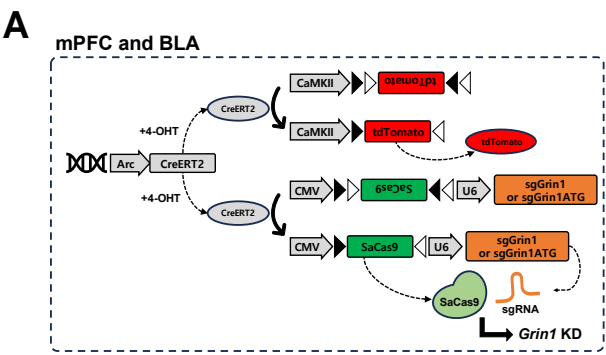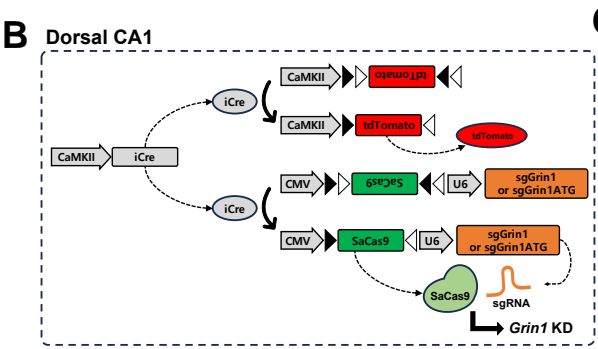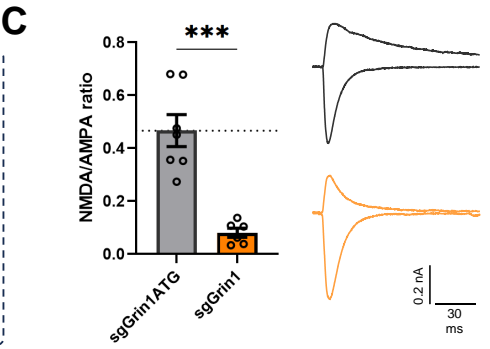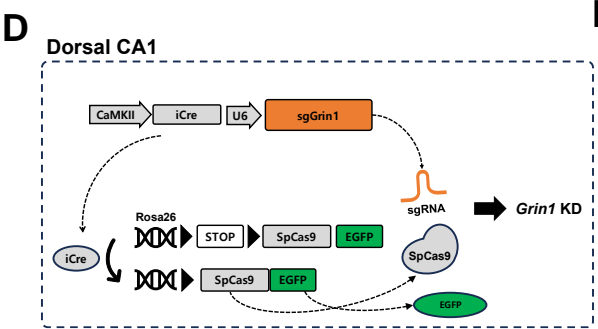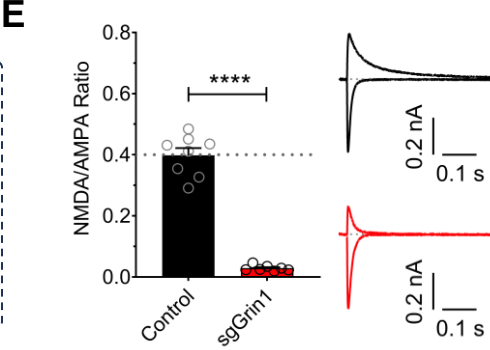

Supplement: MOESM1 [file 13041_2025_1203_MOESM1_ESM.pdf]
